# Supplementary material for: Combinatorial control of diverse metabolic and physiological functions by transcriptional regulators of the yeast sulfur assimilation pathway
Source: PubMed Central journal article supplement — Mol Biol Cell. 2012 Aug 1;23(15):3008–24. doi: 10.1091/mbc.E12-03-0233 (PMC3408426; doi:10.1091/mbc.e12-03-0233), 2012-08-01
Supplement: supp_E12-03-0233_CombinedSupMats.pdf [file supp_E12-03-0233_CombinedSupMats.pdf]

SUPPLEMENTARY FIGURE LEGENDS

**A.**

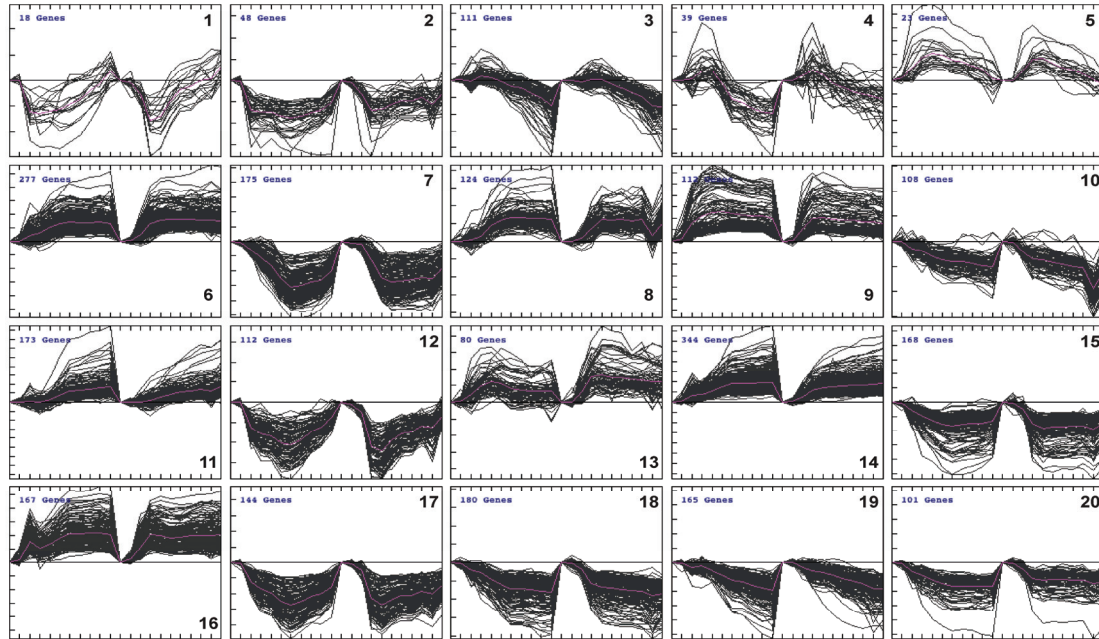

**B.**

**Cluster 3**

Cell cycle; S phase; Cell wall organization; M phase; Interphase; Cytokinesis. TF binding sites: Ndd1, Fkh1, Fkh2, Mbp, Tec1, Swi5, Swi4, Swi6, Ste1, Ash1

**Cluster 4**

Nucleosome assembly; Chromatin assembly; Histidine biosynthesis; Rho signal transduction; Methionine biosynthesis; Histone methylation; Establishment of cellular polarity. TF binding sites: Swi4, Swi6, Gcn4

**Cluster 5**

Pheromone response; Translational elongation; Serine family amino acid biosynthesis; Sulfur metabolism. TF binding sites: Ste12, Dig1

**Cluster 6**

Response to stress; Response to pH; Response to heat; Fatty acid metabolism; Regulation of Ras GTPase activity; Response to toxin; Autophagy.

**Cluster 9**

Sulfur amino acid metabolism; Methionine metabolism; Aspartate family metabolism; Serine family metabolism; Cysteine metabolism; Response to hydrogen peroxide; Response to cadmium; Oxidation-reduction; Response to oxidative stress; Autophagy. TF binding sites: Fkh1, Gcn4, Cbf1, Met31, Met32

**Cluster 10**

DNA packaging; Chromosome condensation; DNA replication; Mitochondrial translation; Chromatin modification; Histone methylation.

**Cluster 11**

Protein folding; Generation of precursor metabolites and energy (TCA cycle); Glucose metabolism; Oxidation-reduction; ATP synthesis-coupled electron transport; Iron-sulfur cluster assembly; Electron transport chain. TF binding sites: Msn2, Msn4, Hap4.

**Cluster 13**

Amino acid biosynthesis; Pheromone response; GPCR signaling. TF binding sites: Ste12, Gcn4.

**Cluster 14**

Autophagy; Response to heat; Mitochondrion degradation; Negative regulation of gluconeogenesis; Sporulation; Lactate metabolism.

**Cluster 16**

Response to heat; Metabolism of energy reserves; Glycogen biosynthesis; Glucose metabolism; Generation of precursor metabolites and energy; Trehalose metabolism; Oxidation-reduction; Autophagy; Phosphate metabolism; Response to oxidative stress. TF binding sites: Msn2, Msn4.

**Cluster 19**

Cell cycle; Mitosis; DNA replication; Chromosome segregation; Cell polarity; DNA repair. TF binding sites: Mbp1, Swi4, Swi6, Stb1.

**Cluster 20**

Amino acid catabolism; Divalent metal ion transport; Electron transport (cytochrome c to oxygen); Mitosis; DNA synthesis during DNA repair; fermentation.

**Figure S1. *k*-means clustering of Met-dependent genes in two biosynthetic mutants. A) *k*-means clustering and B) Gene Ontology (GO) term enrichment for genes that are similarly expressed in *met6Δ* and *met13Δ* during Met starvation. Each cluster shows data for *met6Δ* (left) and *met13Δ* (right).**

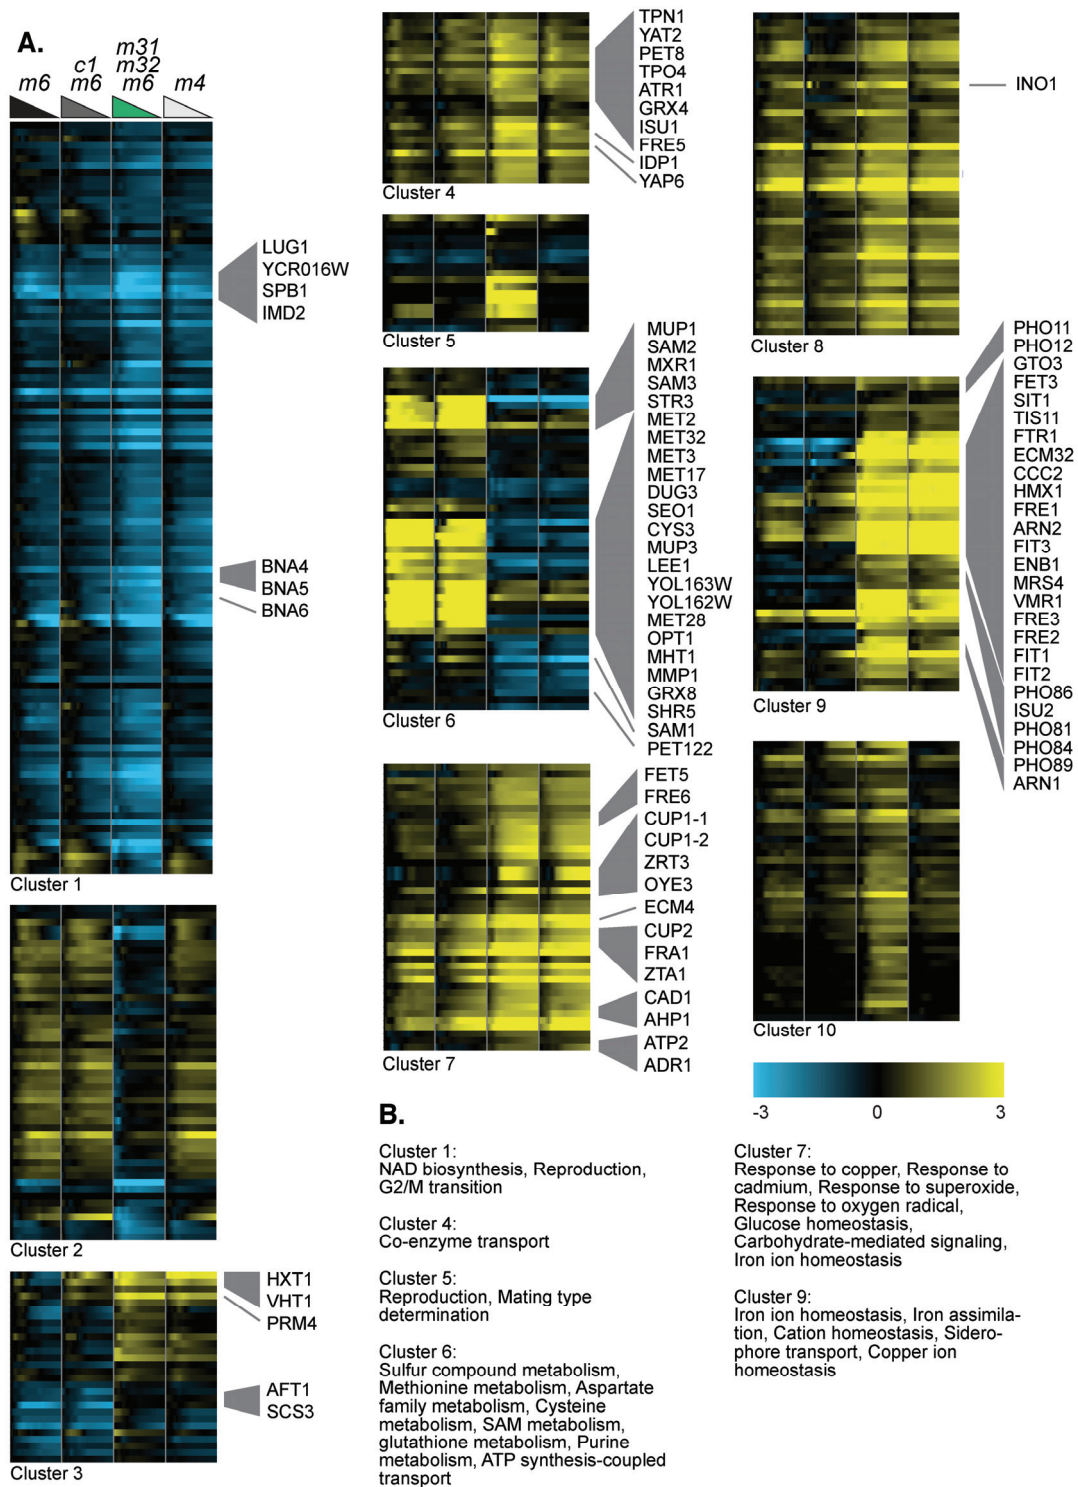

**Figure S2. All genes whose expression depends on *MET31/MET32*.** A) All genes that depend statistically significantly on *MET31/MET32* but not *CBF1*. Strain order is *met6Δ*, *cbf1Δmet6Δ*, *met31Δmet32Δmet6Δ*, *met4Δ*. Genes of particular interest are shown. B) GO term enrichment.

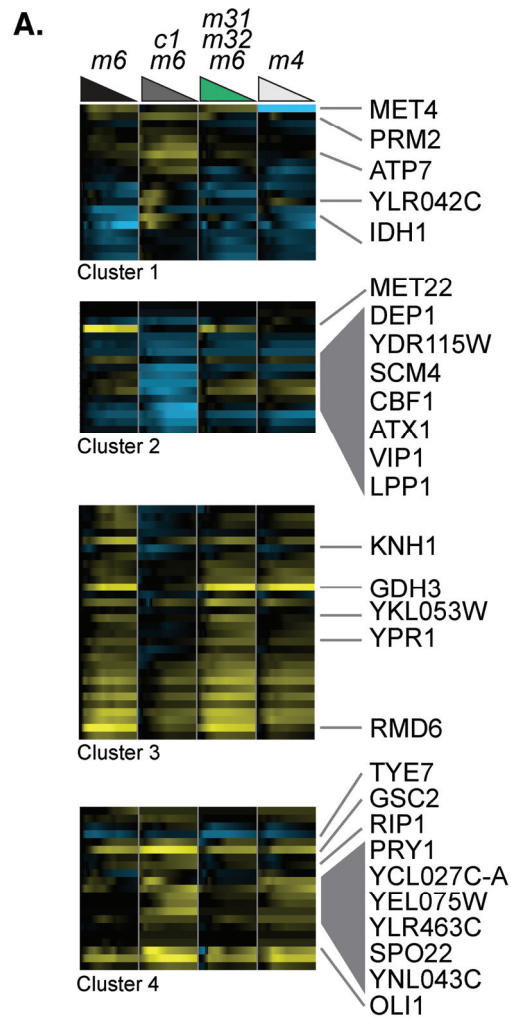

**B.** Cluster 1:  
Deoxyribonucleotide metabolism

Cluster 2:  
Sulfate assimilation

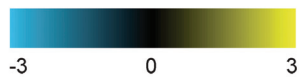

**Figure S3. All genes whose expression depends on *CBF1*.** A) All genes that depend statistically significantly on *CBF1* but not *MET31/MET32*. Strain order is *met6Δ*, *cbf1Δmet6Δ*, *met31Δmet32Δmet6Δ*, *met4Δ*. Genes of particular interest are shown. B) GO term enrichment.

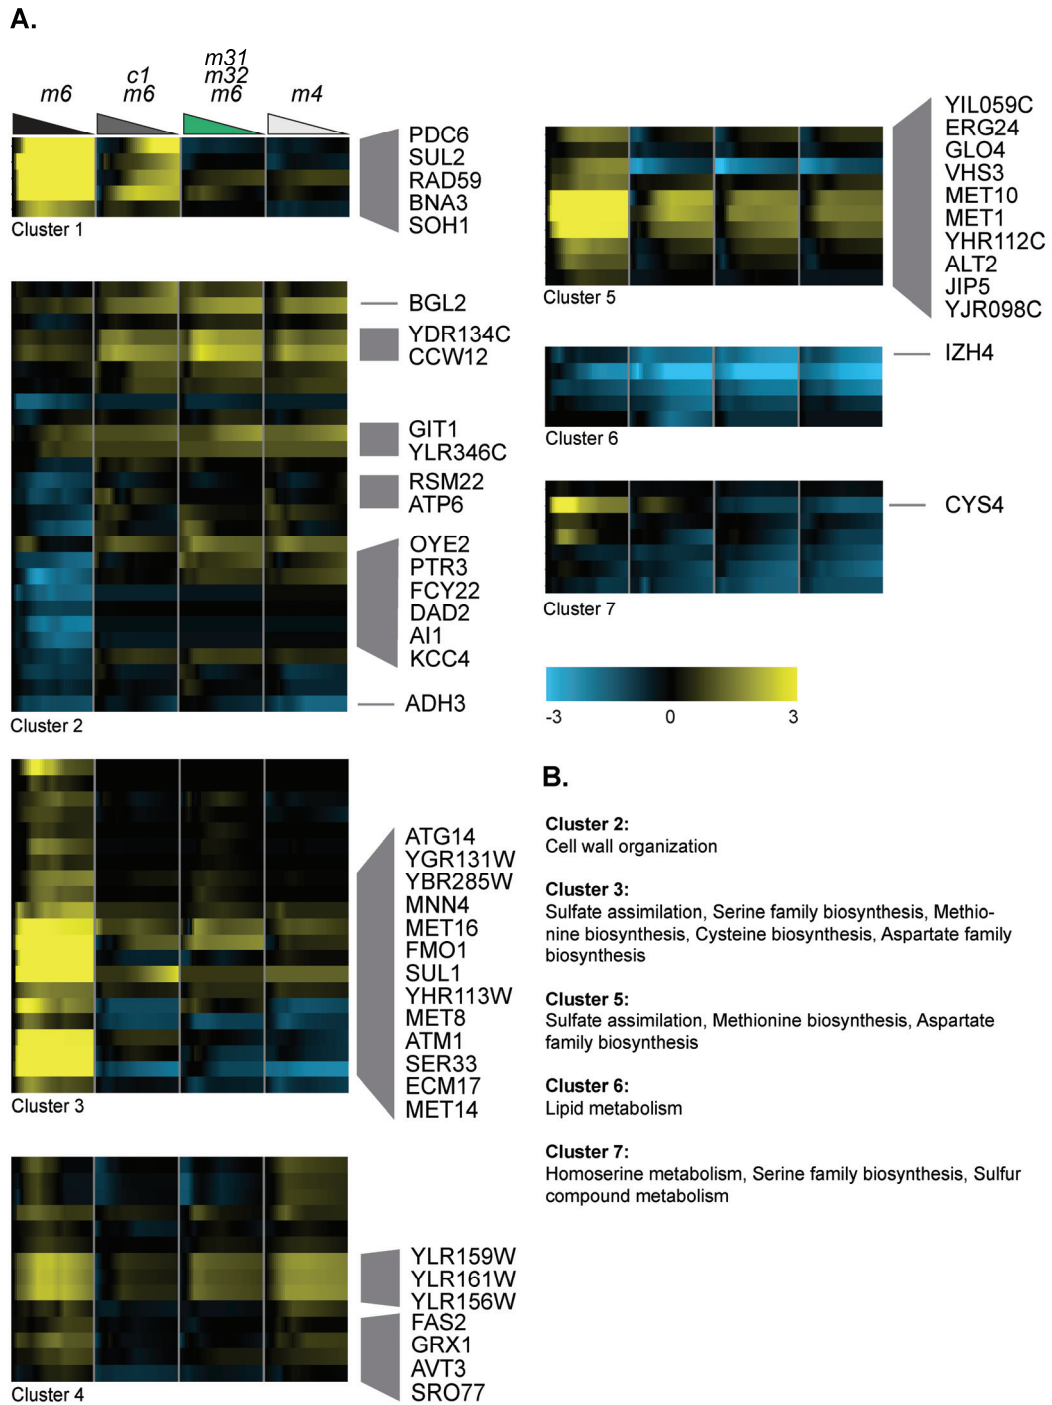

**Figure S4. All genes whose expression depends on *MET31/MET32* and *CBF1*.** A) All genes that depend statistically significantly on *MET31/MET32* and *CBF1*. Strain order is *met6* $\Delta$ , *cbf1* $\Delta$ *met6* $\Delta$ , *met31* $\Delta$ *met32* $\Delta$ *met6* $\Delta$ , *met4* $\Delta$ . Genes of particular interest are shown. B) GO term enrichment.





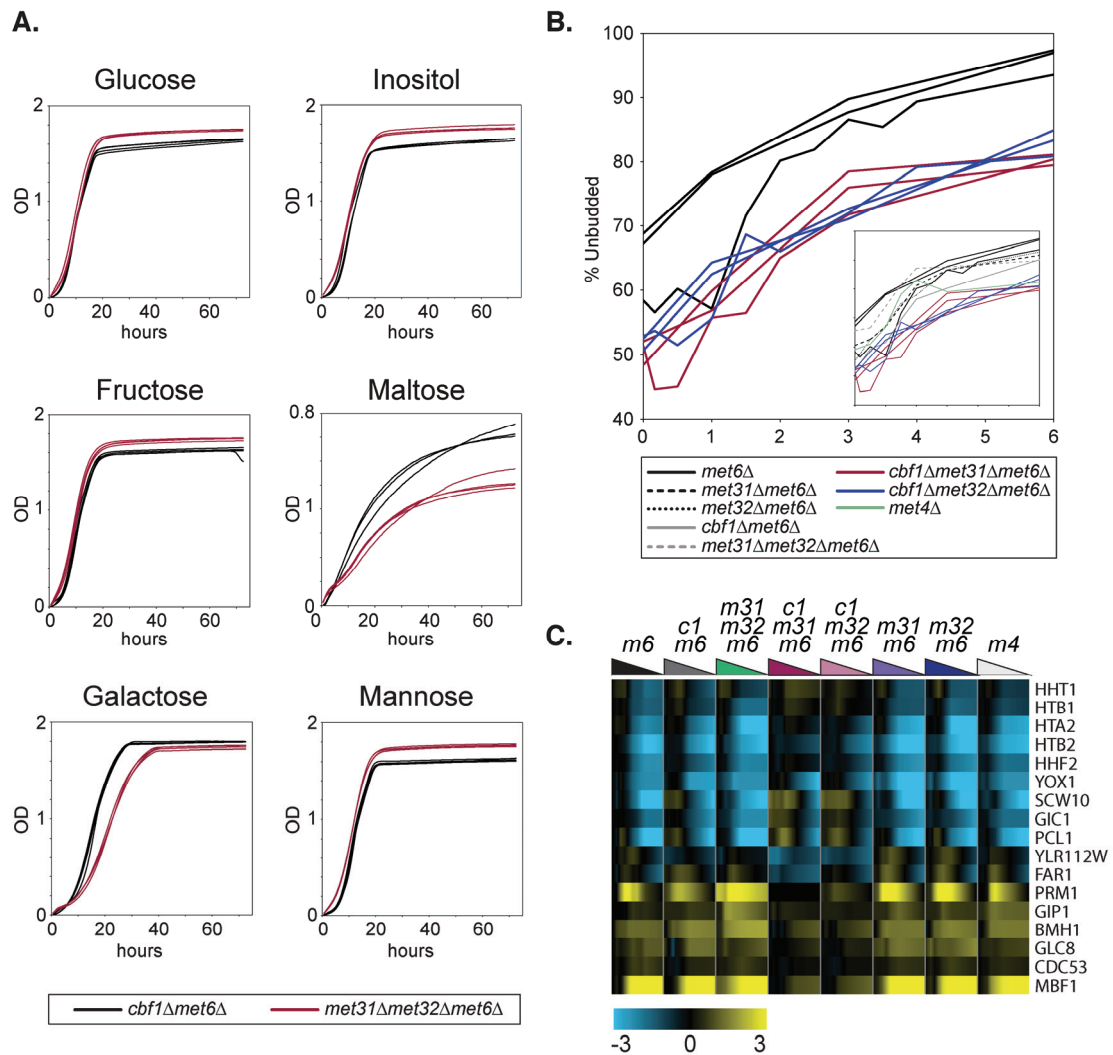

**Figure S6. Growth rate and cell cycle arrest phenotypes.** A) Comparison of *cbf1Δmet6Δ* (black) and *met31Δmet32Δmet6Δ* (red) growth rates in different carbon sources. B) Cell cycle arrest phenotypes. Percent unbudded cells (*i.e.* bud index) measured during six hours of Met starvation for three replicates each of *met6Δ*, which arrests efficiently, and *cbf1Δmet31Δmet6Δ* and *cbf1Δmet32Δmet6Δ*, which do not arrest efficiently. Inset: Bud index for all strains. C) Potentially Met-dependent cell cycle genes.

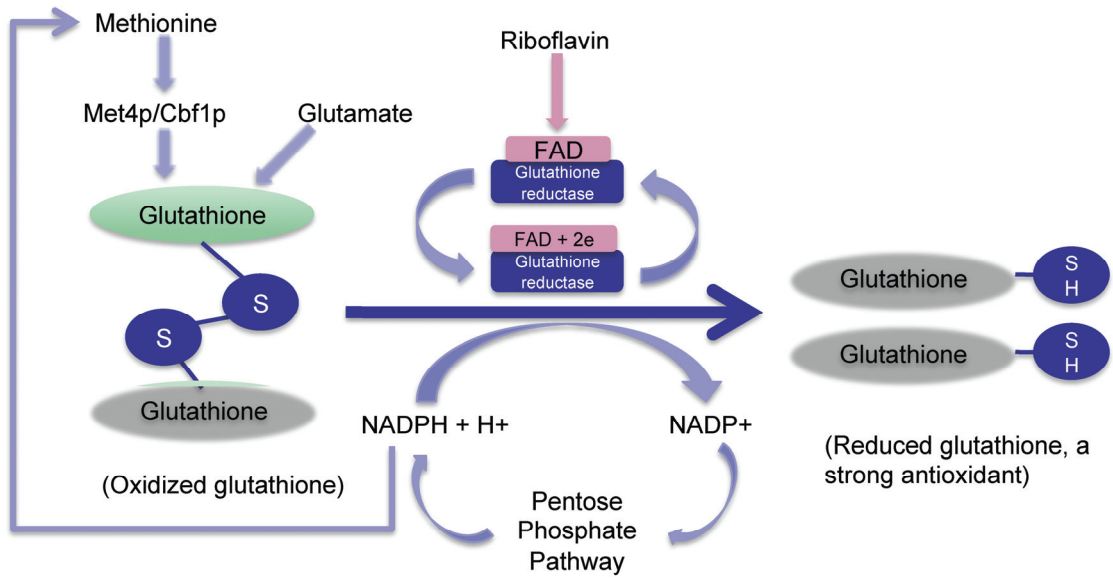

**Figure S7. Relationship between antioxidants and Met-regulated metabolites.**
